# Supplementary material for: Perceived ethnic discrimination in relation to smoking and alcohol consumption in ethnic minority groups in The Netherlands: the HELIUS study
Source: PubMed Central journal article supplement (PMC5641269; doi:10.1007/s00038-017-0977-2), 2017-05-16
Supplement: 38_2017_977_MOESM1_ESM.pdf [file 38_2017_977_MOESM1_ESM.pdf]

## Electronic Supplementary Material

Article title:

Perceived ethnic discrimination in relation to smoking and alcohol consumption in ethnic minority groups in the Netherlands: the HELIUS study

Journal:

International Journal of Public Health

Authors:

Marlies J. Visser<sup>1</sup>, Umar Z. Ikram<sup>1\*</sup>, Eske M. Derks<sup>2,3</sup>, Marieke B. Snijder<sup>1</sup>, Anton E. Kunst<sup>1</sup>.

<sup>1</sup> Department of Public Health, Academic Medical Center, University of Amsterdam, P.O. Box 8 22660, 1100 DD Amsterdam, the Netherlands.

<sup>2</sup> Department of Psychiatry, Academic Medical Center, University of Amsterdam

<sup>3</sup> QIMR Berghofer, Translational Neurogenomics group, Brisbane, Australia

\*Corresponding author

E-mail: u.ikram@amc.uva.nl, phone: +31 20 5667441, fax: +31 20 69 72316

Supplementary table 1. The association of perceived ethnic discrimination (PED) with smoking and alcohol consumption in ethnic minority groups, additionally adjusted for neuroticism (besides age, sex, marital status, educational level, employment status and other psychosocial stressors) in the HELIUS study, Amsterdam, the Netherlands, 2011-2015

| Outcome Variable            | Ethnicity              |                    |                 |                 |                 |
|-----------------------------|------------------------|--------------------|-----------------|-----------------|-----------------|
|                             | South-Asian Surinamese | African Surinamese | Ghanaian        | Turkish         | Moroccan        |
| <b>Smoking</b>              |                        |                    |                 |                 |                 |
| Current smoking             | 0.94(0.84-1.04)        | 1.14(1.04-1.25)    | 0.88(0.67-1.16) | 0.94(0.85-1.04) | 0.92(0.81-1.04) |
| Heavy smoking/smokers       | 1.14(0.95-1.36)        | 1.06(0.91-1.24)    | 2.10(0.96-4.59) | 0.87(0.74-1.03) | 0.92(0.71-1.20) |
| Nicotine dependence/smokers | 1.10(0.92-1.32)        | 1.29(1.10-1.51)    | 1.14(0.48-2.67) | 0.99(0.85-1.16) | 1.08(0.86-1.37) |
| <b>Alcohol consumption</b>  |                        |                    |                 |                 |                 |
| Current drinking            | 0.94(0.85-1.04)        | 1.06(0.97-1.17)    | 1.22(1.08-1.36) | 0.92(0.81-1.04) | 0.65(0.55-0.78) |
| Excessive drinking drinkers | 0.98(0.75-1.29)        | 1.11(0.90-1.36)    | 1.10(0.73-1.66) | 1.04(0.63-1.71) | 0.60(0.25-1.45) |
| Alcohol dependence drinkers | 0.93(0.76-1.12)        | 1.25(1.06-1.48)    | 1.23(0.96-1.57) | 1.08(0.83-1.41) | 1.08(0.74-1.58) |
